# Supplementary material for: Thermal effect on the morphology and performance of organic photovoltaics
Source: Royal Society of Chemistry journal article supplement (doi:10.1039/c6cp04019e), 2016-01-01
Supplement: c6cp04019e1.pdf [file c6cp04019e1.pdf]

## Supporting Information for “Thermal Effect on Morphology and Performance of Organic Photovoltaics”

Eisuke Kawashima,<sup>ab</sup> Mikiya Fujii,<sup>ab</sup> and Koichi Yamashita<sup>\*ab</sup>

<sup>a</sup> Department of Chemical System Engineering, Graduate School of Engineering, The University of Tokyo,  
Tokyo 113-8656, Japan.

<sup>b</sup> CREST, Japan Science and Technology Agency (JST), Tokyo 113-8656, Japan

### S1 Reptation

#### S1.1 Results of Polymer/Small Molecule Volumetric Ratio of 1:1

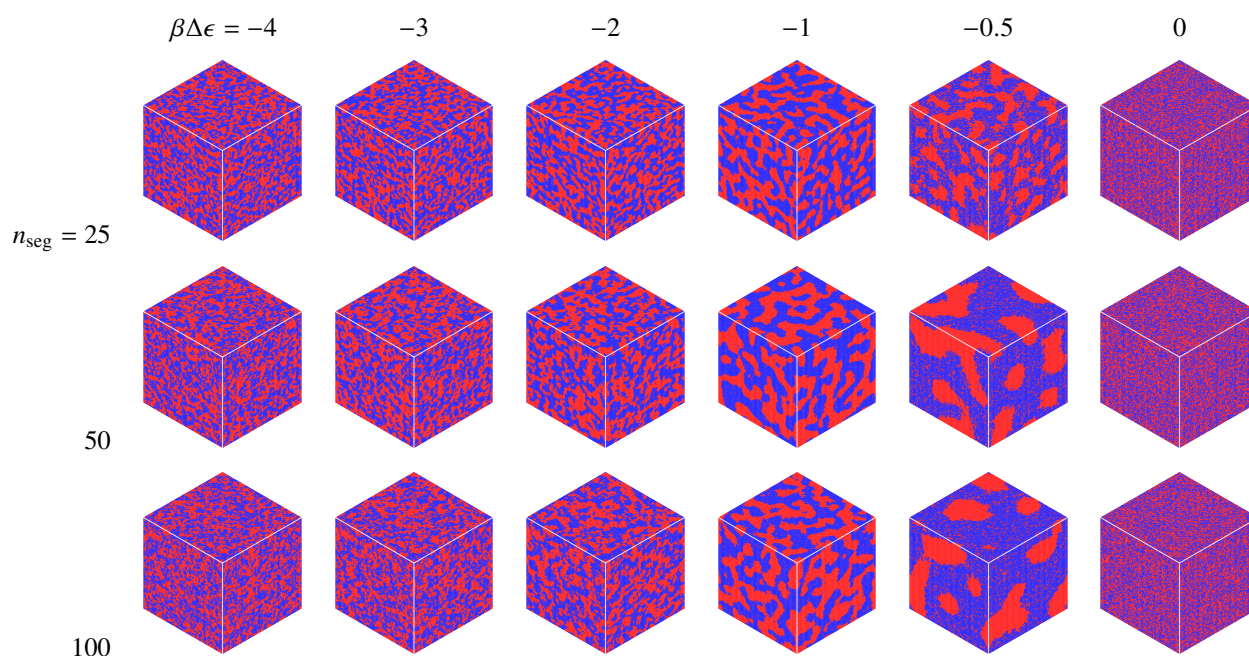

Fig. S1: Morphologies with number of segments  $n_{\text{seg}} = 25, 50, 100$ ; and  $\beta\Delta\epsilon = -4, -3, -2, -1, -0.5, 0$ . Blue and red sites represent polymers and small molecules, respectively.

#### S1.2 Results of Polymer/Small Molecule Volumetric Ratio of 1:2

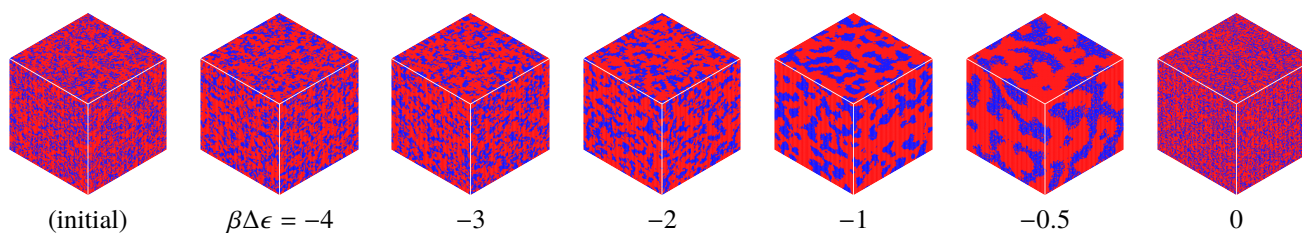

Fig. S2: An initial and generated morphologies. The number of polymer segments is set to 75. Blue and red sites represent polymers and small molecules, respectively.

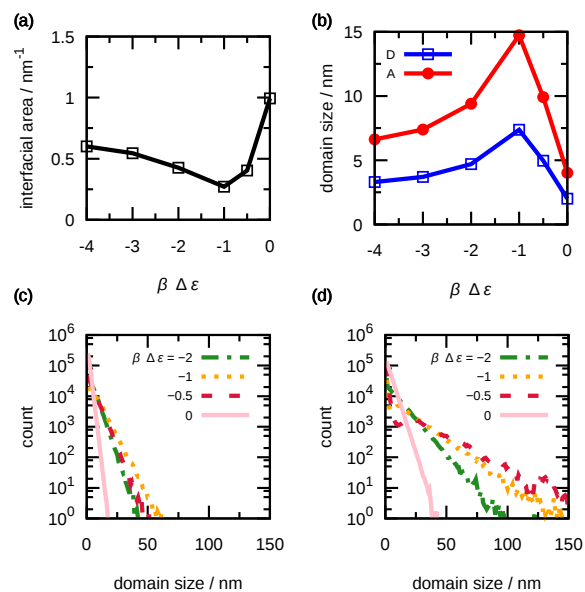

Fig. S3:  $\beta\Delta\epsilon$  dependence of (a) interfacial area and (b) mean domain size of donor (D) and acceptor (A).

## S2 Dynamic Monte Carlo

### S2.1 Performance Parameters

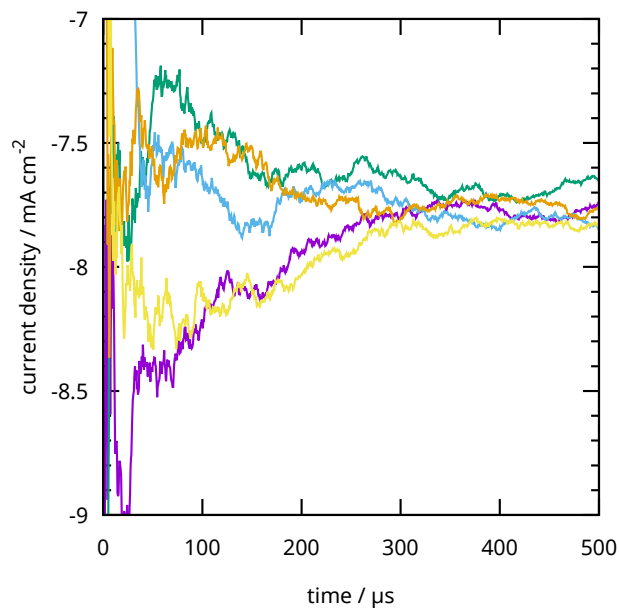

Fig. S4: Current density vs time of five independent simulation runs. The morphology is BHJ with  $\beta\Delta\epsilon$  of  $-4$ , and applied voltage is 0. The first period (0–250 s) was discarded as “burn-in.”

S2.2 Transient Absorption Spectroscopy

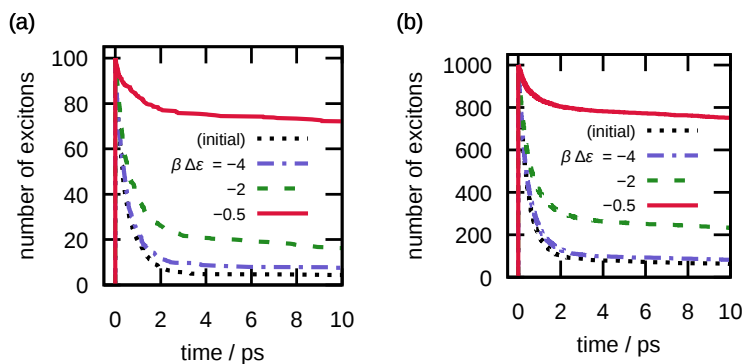

Fig. S5: Simulated number of excitons with initial number of (a) 100 and (b) 1000.

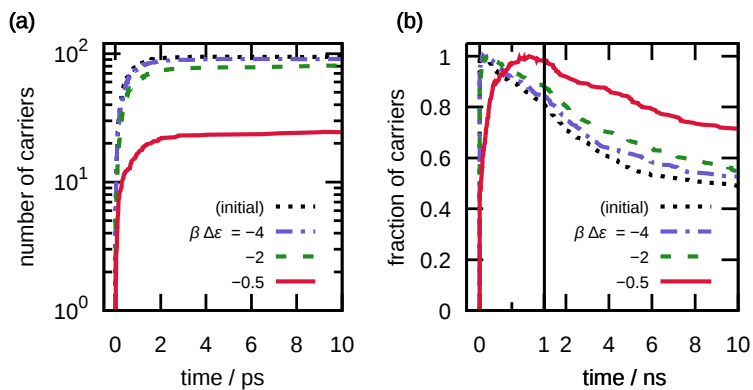

Fig. S6: Simulated charge (a) generation and (b) recombination dynamics of initial structure and morphologies with various  $\beta \Delta \epsilon$ . The number of initial excitons is 100.

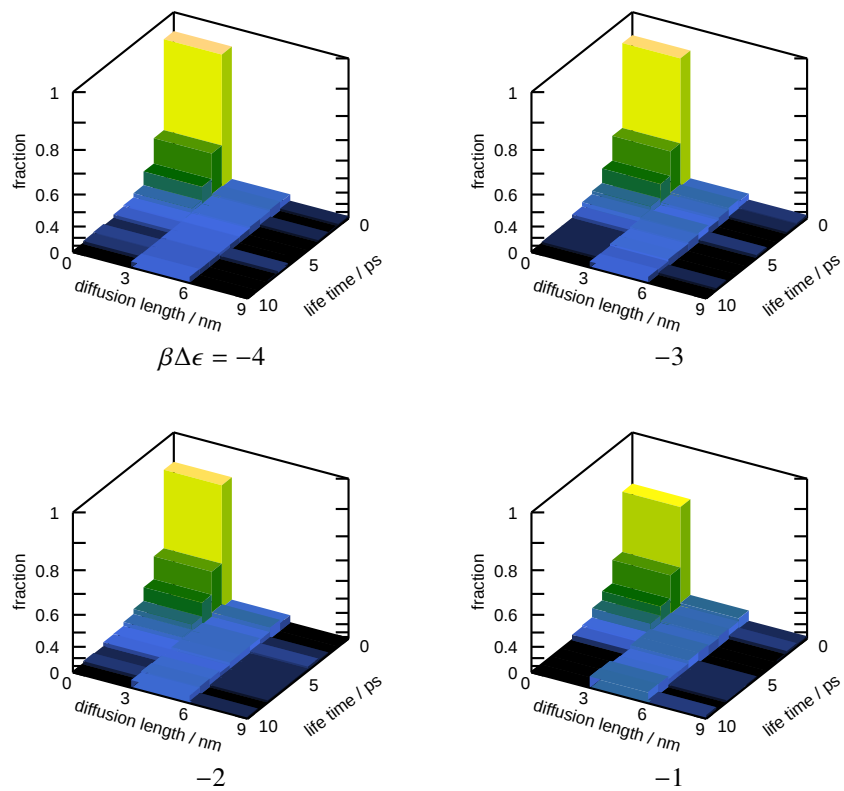

Fig. S7: Fraction of diffusion length and life time of dissociated excitons of each morphology. The number of initial excitons is 1000.

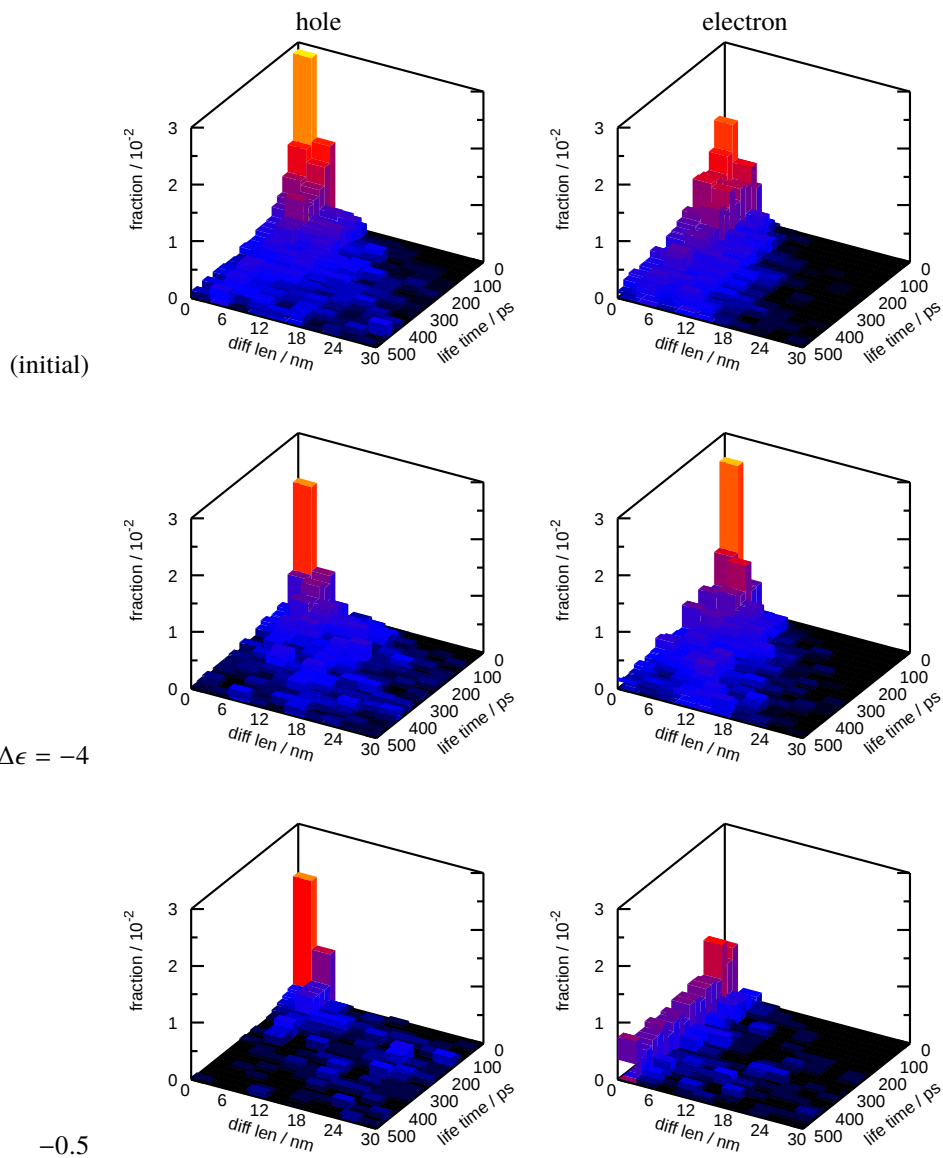

Fig. S8: Diffusion length and life time of the recombined holes and electrons. The number of initial excitons is 1000.
